# Supplementary material for: E2F1 Promotes Progression of Bladder Cancer by Modulating RAD54L Involved in Homologous Recombination Repair
Source: Int J Mol Sci. 2020 Nov 27;21(23):9025. doi: 10.3390/ijms21239025 (PMC7730422; doi:10.3390/ijms21239025)
Supplement: Supplementary file 1 [file ijms-21-09025-s001.pdf]

**A**

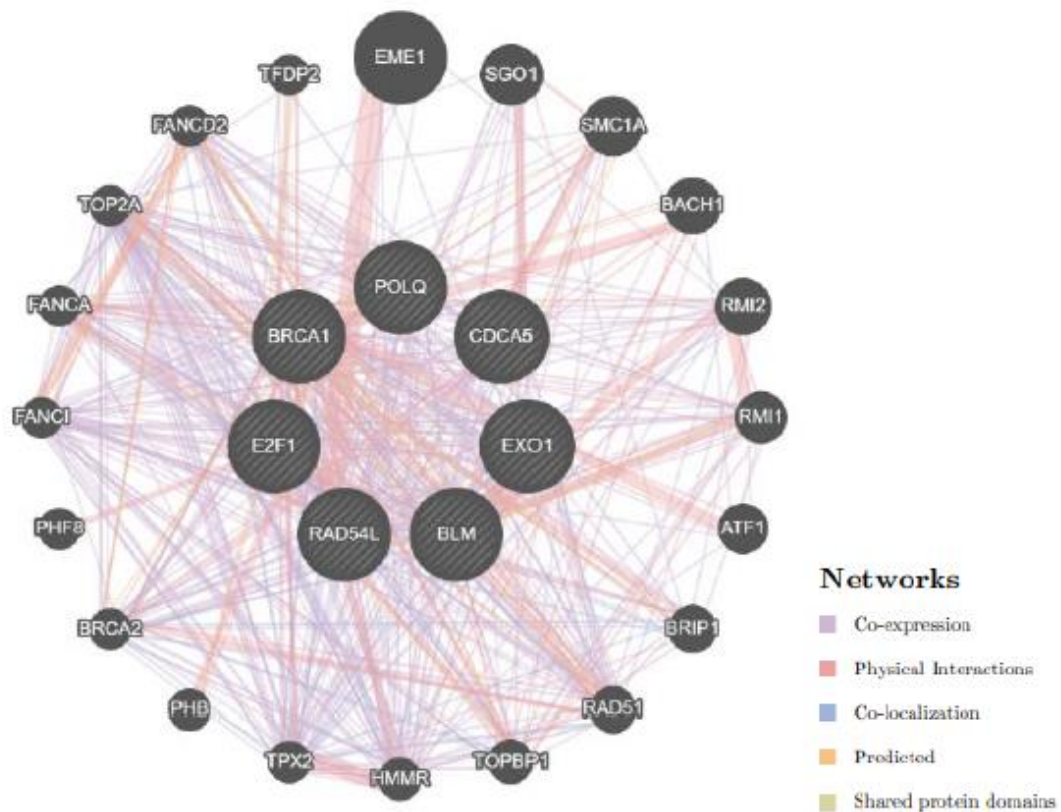

**B**

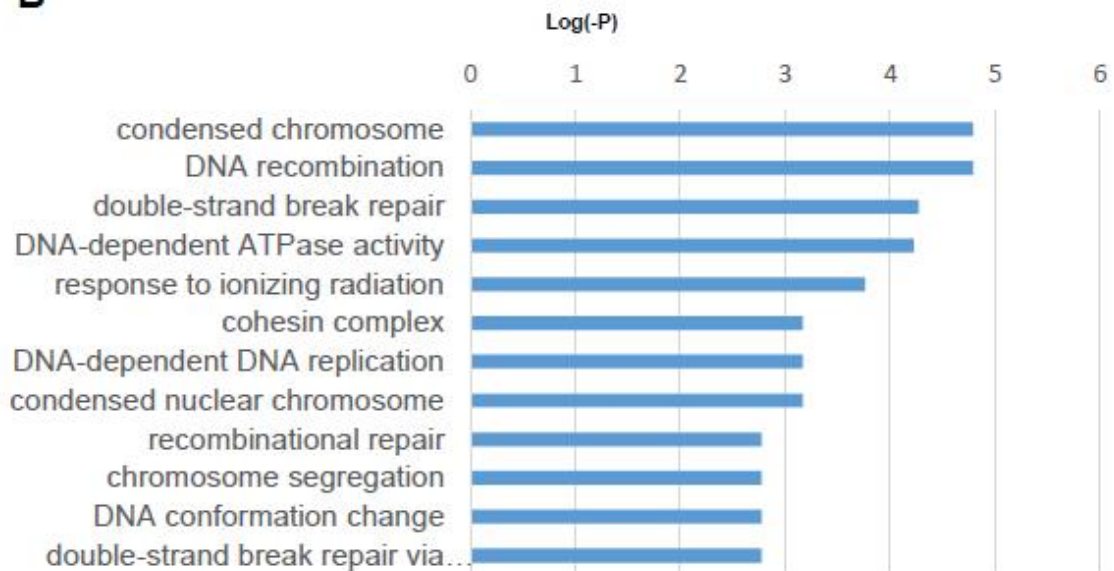

**Figure S1** Gene-gene network analysis showing E2F1 correlated genes. **(A)** Gene-gene interaction network associated with DNA repair genes. Each colored line represents functional and physical interactions in the literature, respectively. These networks were generated by GeneMANIA (<http://genemania.org>) **(B)** GeneMANIA function analysis and significant enrichment of selected genes in bladder cancer patients.

**A**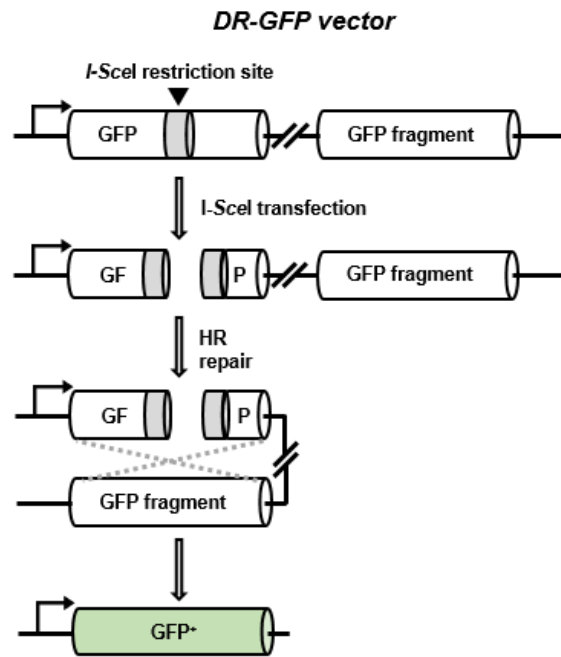

**Figure S2** Schematic diagram of HR assay by DR-GFP. (A) DR-GFP vector contains an I-SceI endonuclease site within the coding region, which abolishes GFP expression. Expression of I-SceI induces single DSBs.

**A**

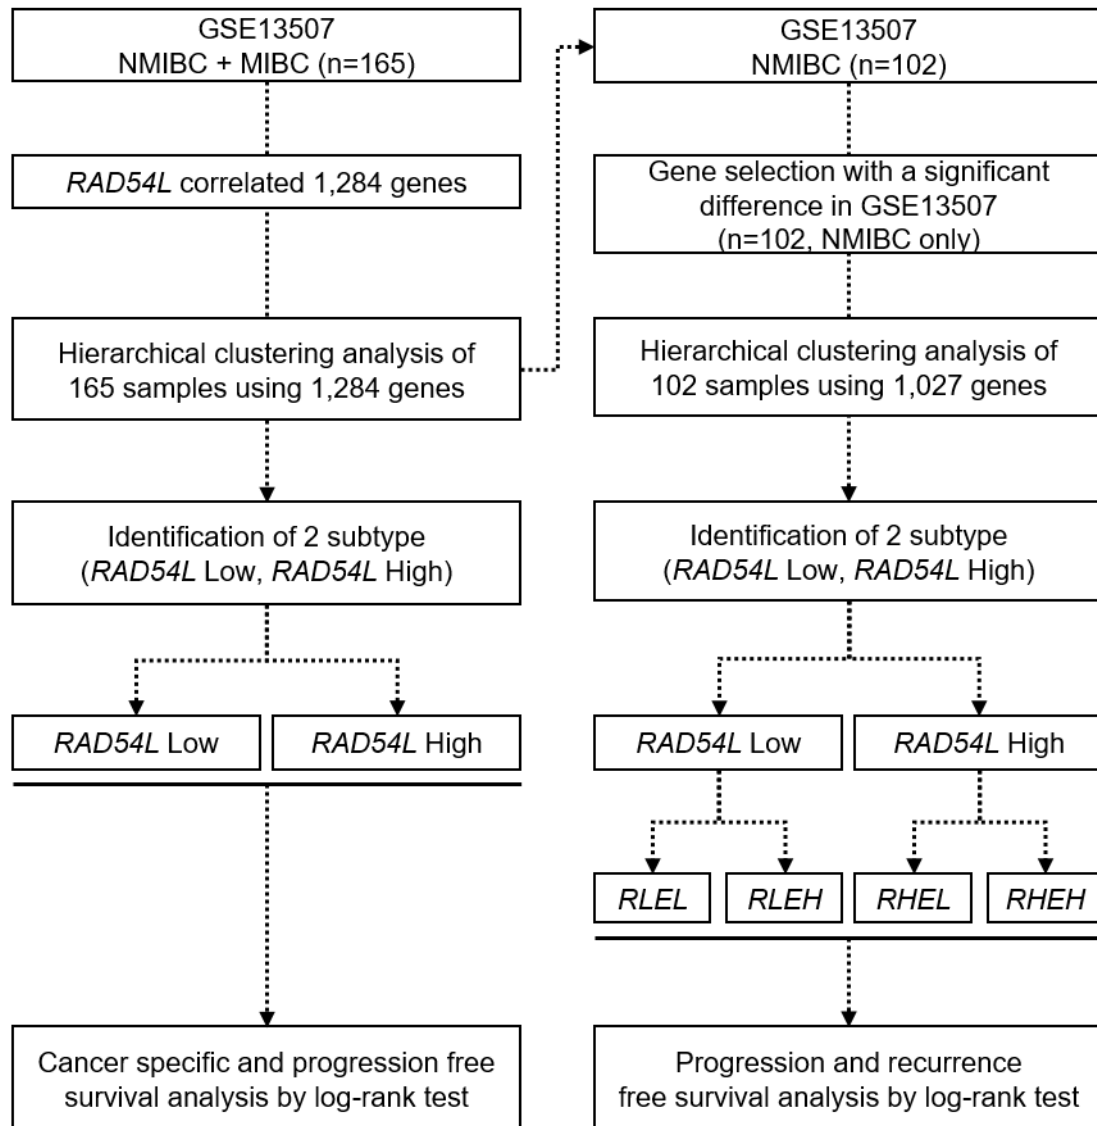

**Figure S3** Schematic diagram of bioinformatics. (A) RLEL, RAD54L low and E2F1 low; RLEH, RAD54L low and E2F1 high; RHEL, RAD54L high and E2F1 low; RHEH, RAD54L high and E2F1 high.

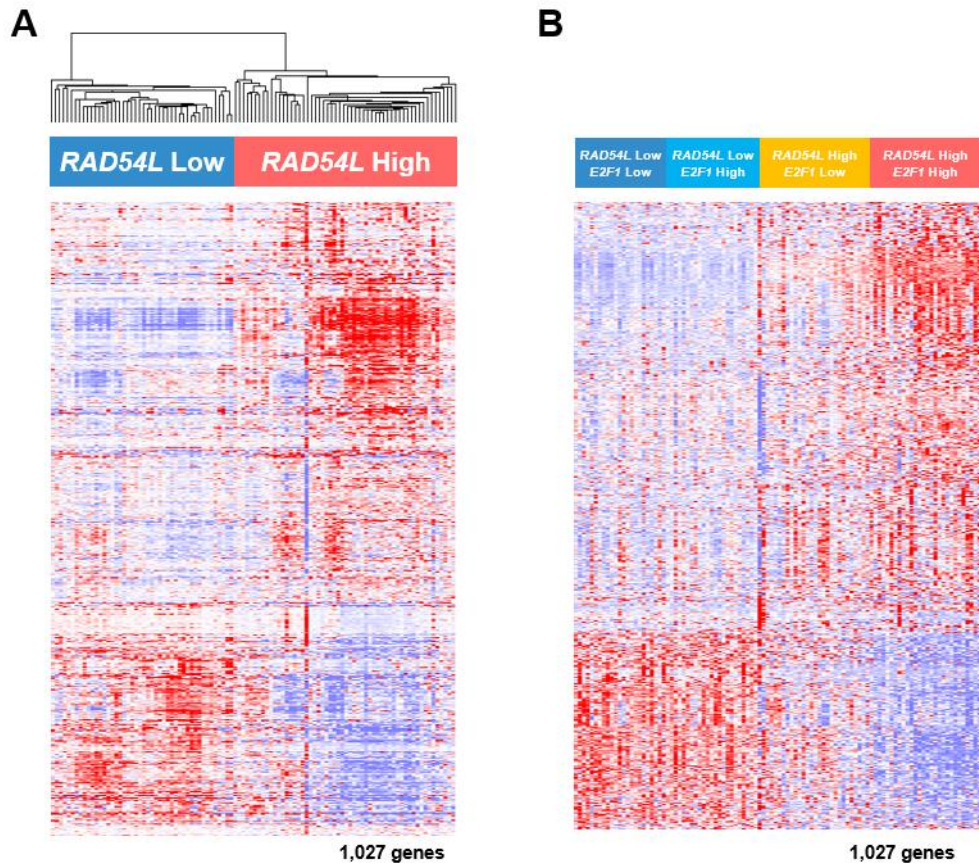

**Figure S4** Hierarchical clustering analysis of gene expression data from GSE13507 for patients with NMIBC. **(A)** Heat map of RAD54L correlated 1,027 genes in 102 NMIBC patients. Two subtypes of patients were revealed from unsupervised clustering analysis using RAD54L correlated 1,027 genes. **(B)** Depending on the expression of E2F1, two subtypes are redefined into four 4 new subtypes.

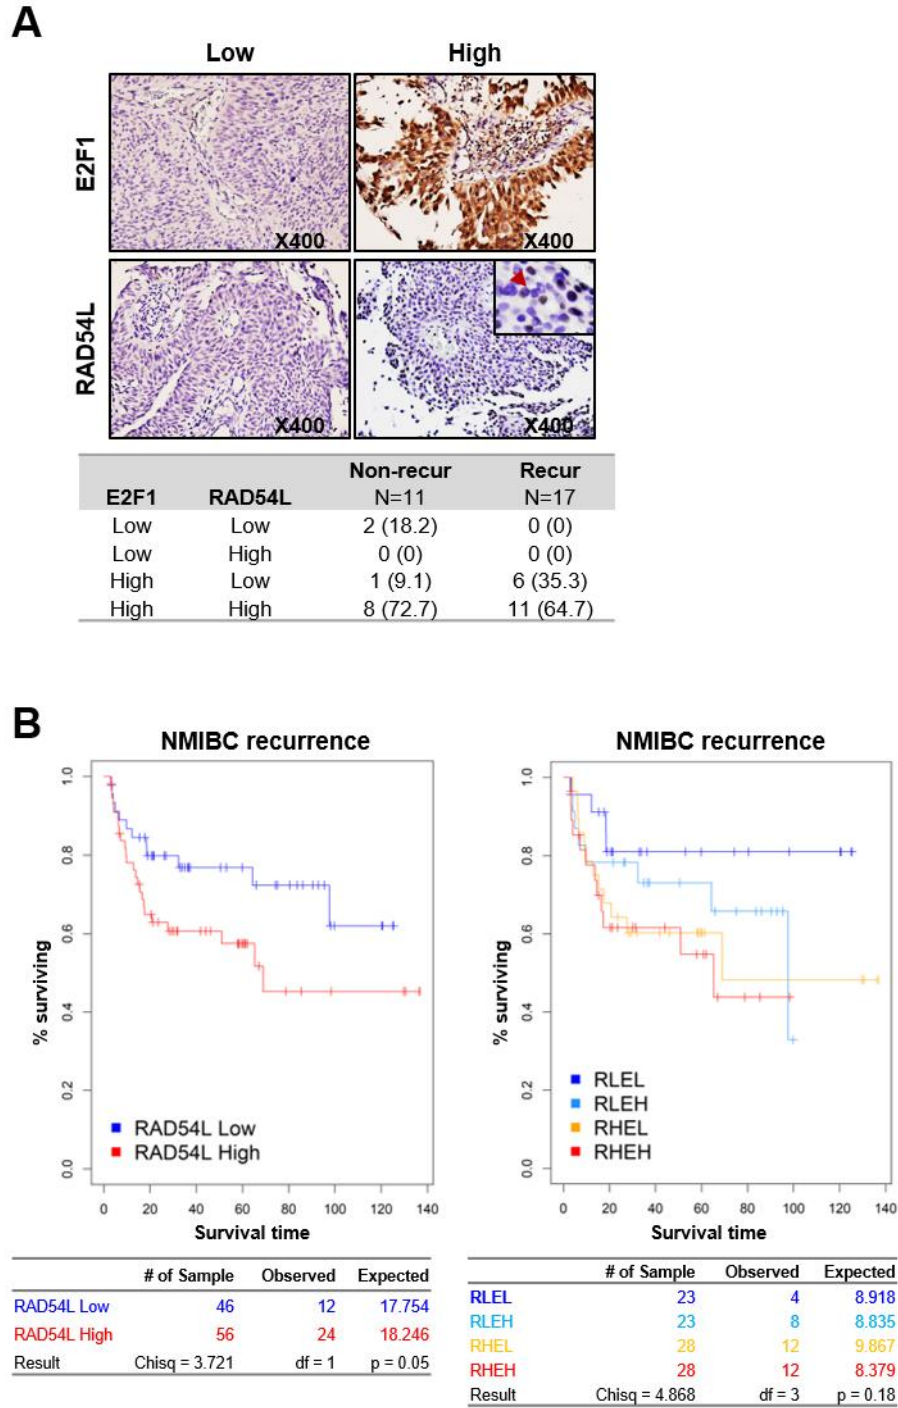

**Figure S5** E2F1 and RAD54L expression levels are not correlated with recurrence in BLC patients. **(A)** IHC staining with anti-E2F1, RAD54L antibody was performed for non-recurrent BLC tumor tissues and recurrent BLC tumor tissues. Photographs were taken at a magnification of 400×. **(B)** Recurrence-free survival in NMIBC patients (GSE13507,  $n = 102$ ,  $p = 0.05$  by log-rank test, left panel). Recurrence-free survival in NMIBC patients (GSE13507,  $n = 102$ ,  $p = 0.18$  by log-rank test, right panel). RLEL, RAD54L low and E2F1 low; RLEH, RAD54L low and E2F1 high; RHEL, RAD54L high and E2F1 low; RHEH, RAD54L high and E2F1 high.
